# Supplementary material for: Group 2 Innate Lymphoid Cells Exhibit Tissue-Specific Dynamic Behaviour During Type 2 Immune Responses
Source: PubMed Central journal article supplement (PMC8415880; doi:10.3389/fimmu.2021.711907), 2021-08-17
Supplement: DataSheet_1.pdf [file DataSheet_1.pdf]

Supplementary figures

Figure S1

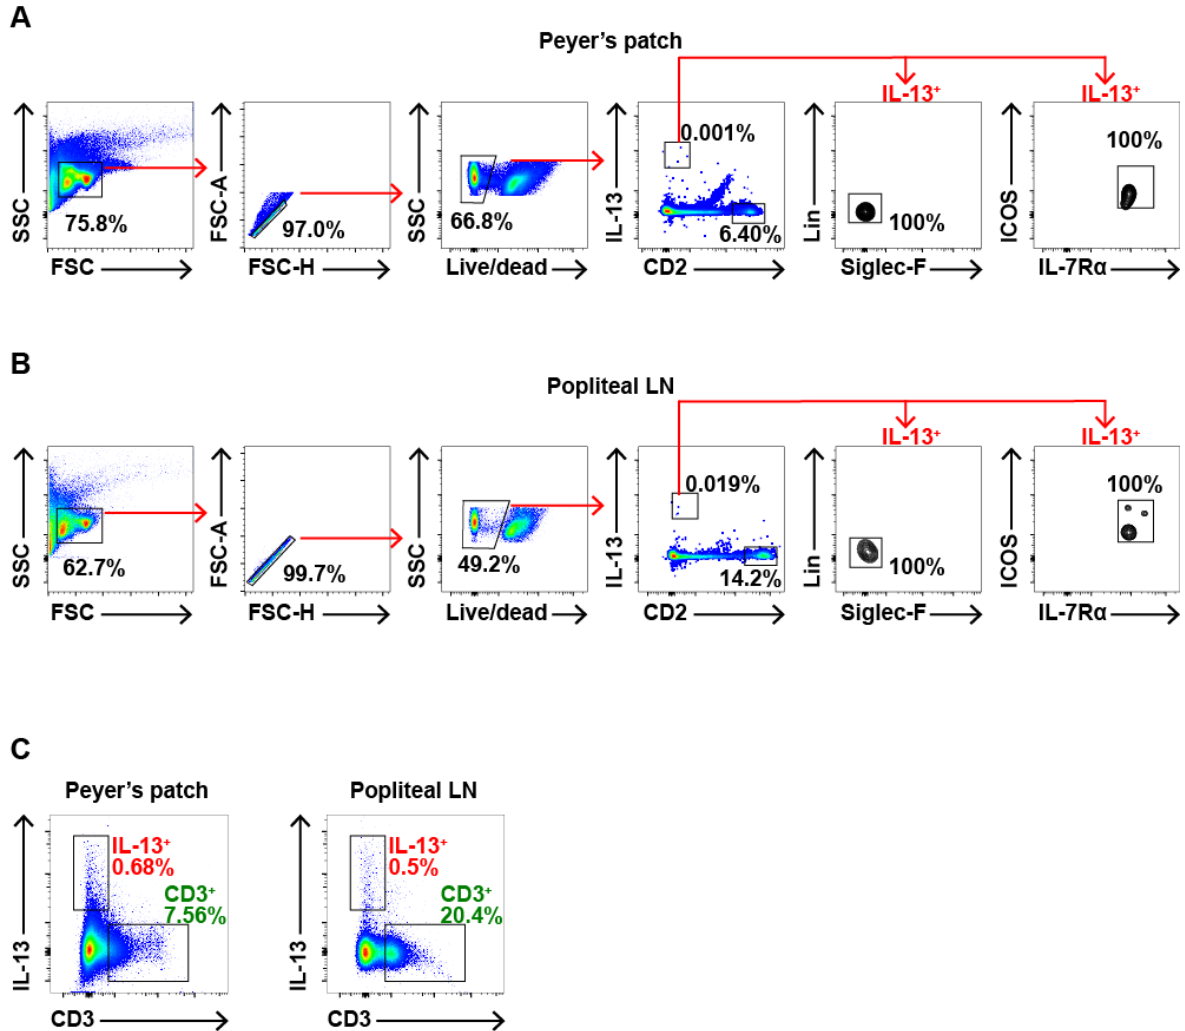

**Figure S1. Specificity of IL-13<sup>+</sup> cells for ILC2s.** (A-B) Flow cytometry plots showing proportions of ILC2s (Lin<sup>neg</sup>Siglec-F<sup>neg</sup>IL-7Rα<sup>+</sup>ICOS<sup>+</sup>) in CD2<sup>neg</sup>IL-13<sup>+</sup> cell populations in (A) PP and (B) popliteal LN. (C) Flow cytometry plots showing proportions of IL-13<sup>+</sup> cells and CD3<sup>+</sup> cells, gated on live cells, in PP and popliteal LN.

Figure S2

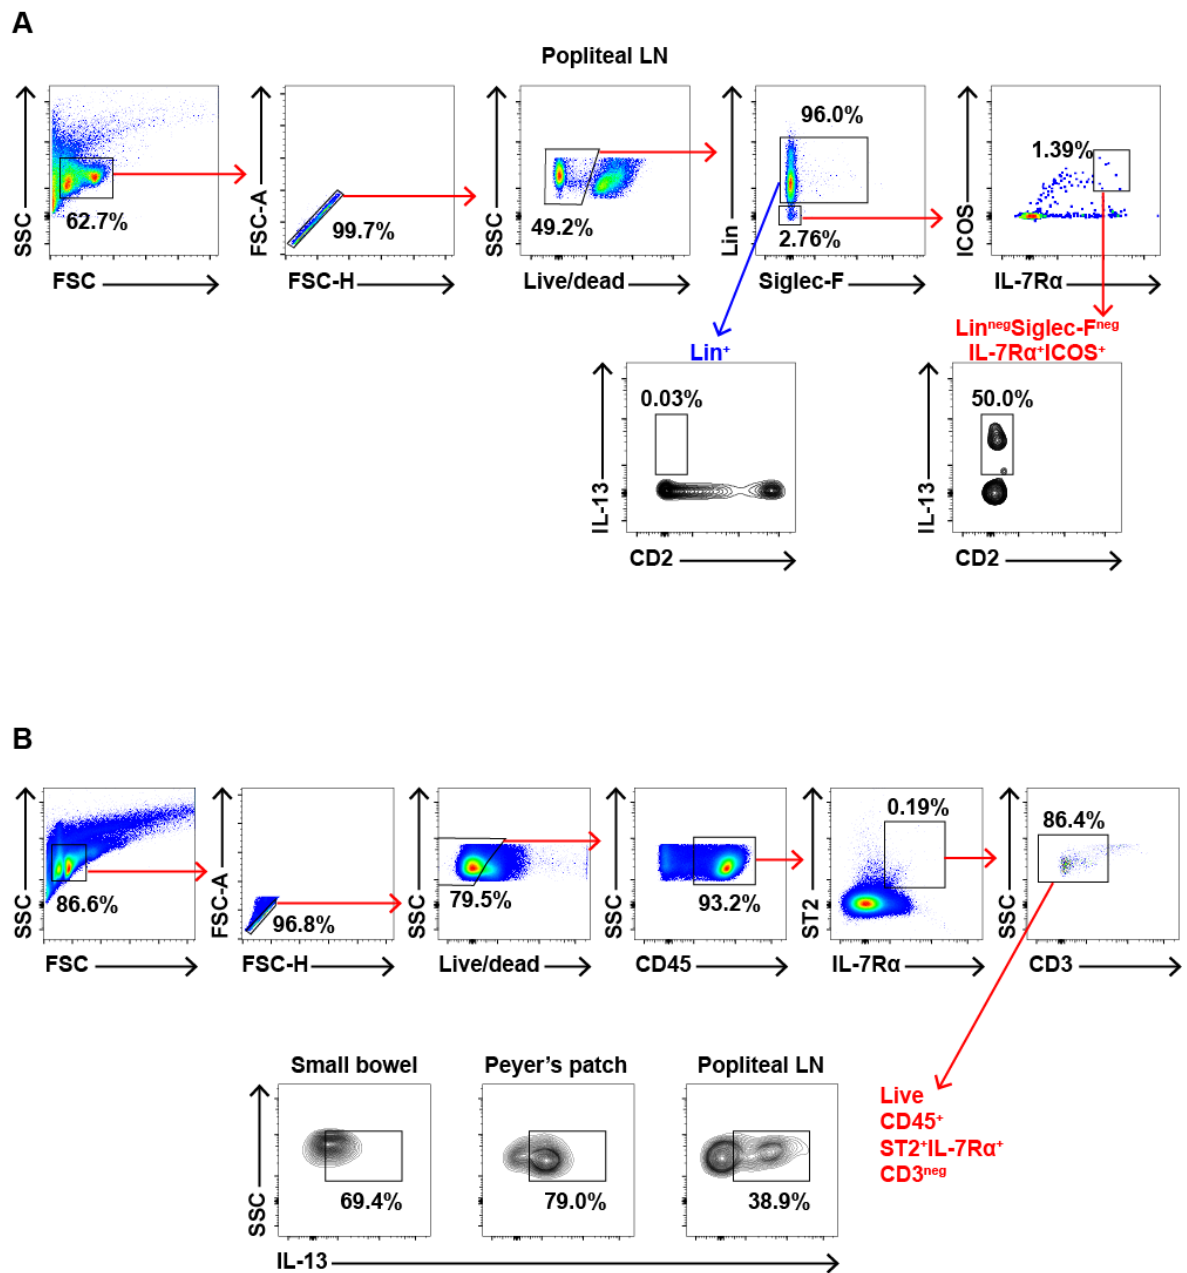

**Figure S2. IL-13 expression by ILC2s.** (A) Flow cytometry plots showing proportions of IL-13-expressing cells in ILC2 and lineage-positive cell populations. (B) Flow cytometry plots showing proportions of IL-13-expressing ILC2s (CD45<sup>+</sup>ST2<sup>+</sup>IL-7Rα<sup>+</sup>CD3<sup>neg</sup>) in mucosal and lymphoid tissues.

### Figure S3

A

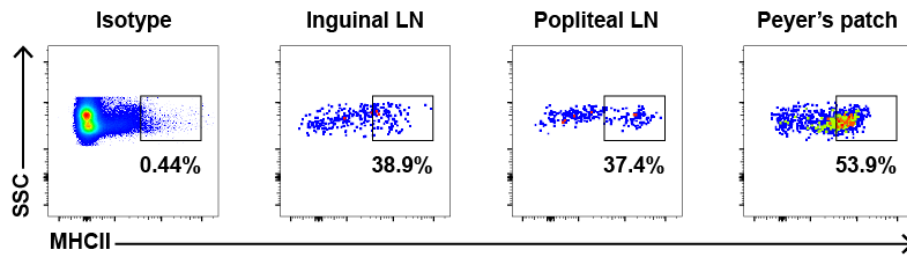

**Figure S3. MHCII expression by ILC2s.** (A) Flow cytometry plots showing expression of MHCII by ILC2s ( $ST2^+IL-7R\alpha^+CD3^{neg}IL-13^+$ ) in lymphoid organs at baseline.

Figure S4

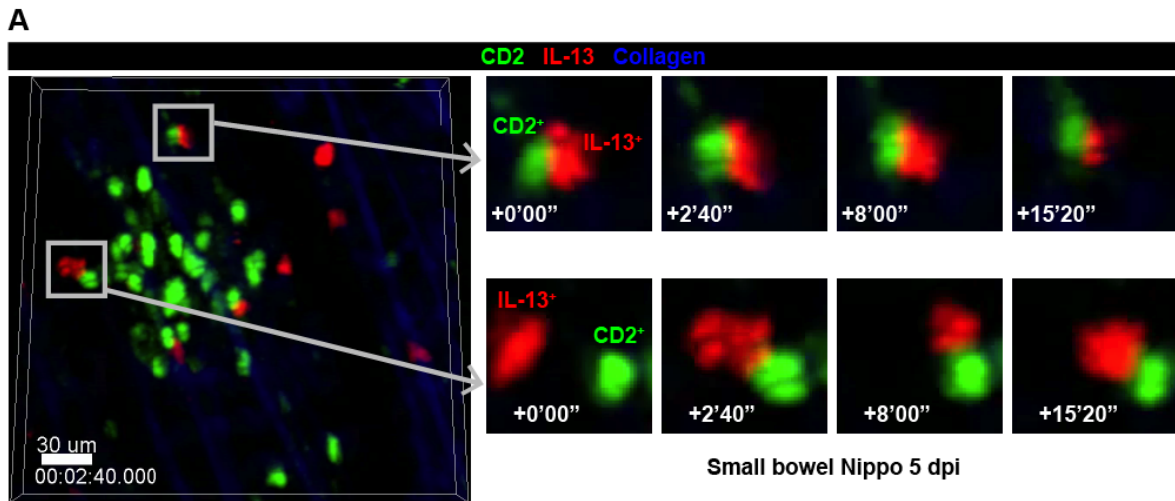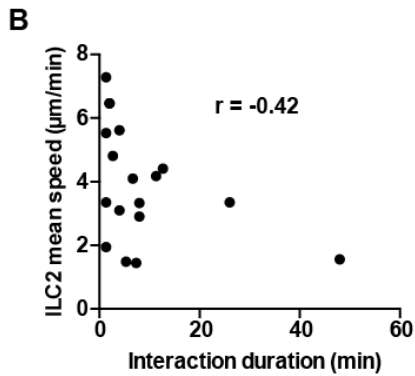

**Figure S4. ILC2s interact with T cells in small bowel mucosa following helminth infection.** (A) Intravital examples of interactions between IL-13<sup>+</sup> ILC2s and CD2<sup>+</sup> T cells in the small bowel mucosa, Nippo 5 dpi; scale bar 30  $\mu$ m, Z 16  $\mu$ m. (B) Graph showing relationship between ILC2 mean migration speed and ILC2-T cell interaction duration, Spearman correlation  $r = -0.42$ ,  $p = 0.08$ .

## Supplementary movies

**Movie S1. PP ILC2s show altered size and movement following helminth infection.**

Intravital movies of ILC2s, without and with cell tracks, in PP uninfected and *N. brasiliensis* (5 dpi); scale bar 50  $\mu\text{m}$ , Z 48  $\mu\text{m}$ , movies at 10 fps.

**Movie S2. ILC2s occasionally and briefly interact with T cells in PP at baseline.**

Intravital example of ILC2-T cell interaction in uninfected PP; scale bar 20  $\mu\text{m}$ , Z 48  $\mu\text{m}$ , movie at 3 fps.

**Movie S3. Popliteal LN ILC2s show dynamic changes following type 2 inflammation.**

Intravital movies of ILC2s with cell tracks in popliteal LN following PBS treatment or *S. mansoni* egg challenge (1 dpi); scale bar 50  $\mu\text{m}$ , Z 40  $\mu\text{m}$ , movies at 10 fps.

**Movie S4. ILC2s occasionally and briefly interact with T cells in popliteal LN at baseline.**

Intravital example of ILC2-T cell interaction in PBS-treated popliteal LN; scale bar 20  $\mu\text{m}$ , Z 30  $\mu\text{m}$ , movie at 3 fps.

**Movie S5. Small bowel ILC2s show dynamic changes following helminth infection.**

Intravital movie of ILC2s, without and with cell tracks, in small bowel mucosa following *N. brasiliensis* infection (5 dpi); scale bar 50  $\mu\text{m}$ , Z 30  $\mu\text{m}$ , movie at 10 fps.

**Movie S6. ILC2s interact with T cells in small bowel mucosa following helminth infection.**

Intravital examples of ILC2-T cell interactions in small bowel mucosa following *N. brasiliensis* infection (5 dpi); scale bar 30  $\mu\text{m}$ , Z 26  $\mu\text{m}$ , movie at 5 fps.
